# Supplementary material for: Rapid NETosis Is an Effector Mechanism to Combat Ocular Herpes Infection
Source: PubMed Central journal article supplement — Invest Ophthalmol Vis Sci. 2024 Jun 25;65(6):36. doi: 10.1167/iovs.65.6.36 (PMC11210628; doi:10.1167/iovs.65.6.36), 2024-06-25
Supplement: iovs-65-6-36_s001.pdf [file iovs-65-6-36_s001.pdf]

## Supplementary fig.1

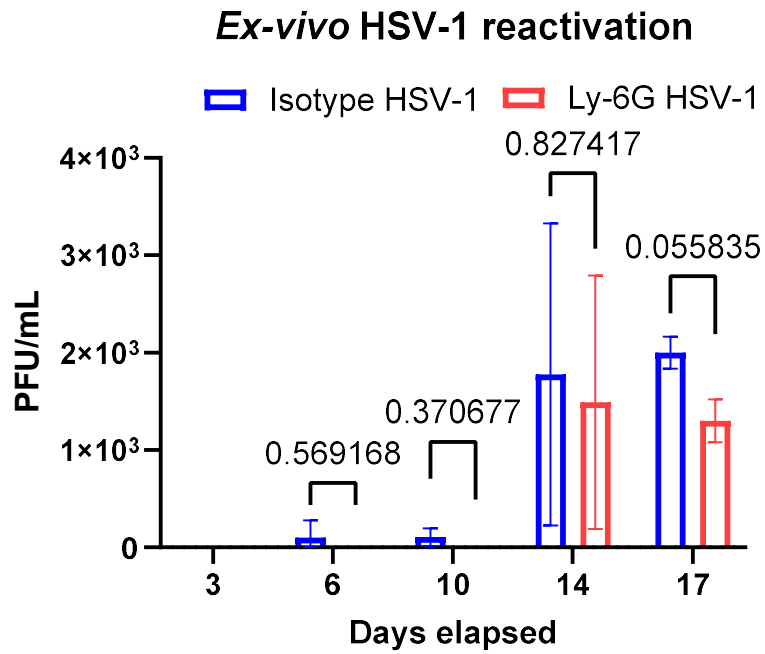

**Supplementary figure 1.** Trigeminal ganglion tissues were collected at 12 dpi from the mice from experimental groups (n=3 per group) and monitored for the HSV-1 by ex-vivo reactivation assay. Statistical analysis was performed using unpaired t test with Welch correction Individual variance for each group value showing q value, Two-stage step-up (Benjamini, Krieger, and Yekutieli).
