# Supplementary material for: Rapid NETosis Is an Effector Mechanism to Combat Ocular Herpes Infection
Source: PubMed Central journal article supplement — Invest Ophthalmol Vis Sci. 2024 Jun 25;65(6):36. doi: 10.1167/iovs.65.6.36 (PMC11210628; doi:10.1167/iovs.65.6.36), 2024-06-25
Supplement: iovs-65-6-36_s002.pdf [file iovs-65-6-36_s002.pdf]

## Supplementary fig.2

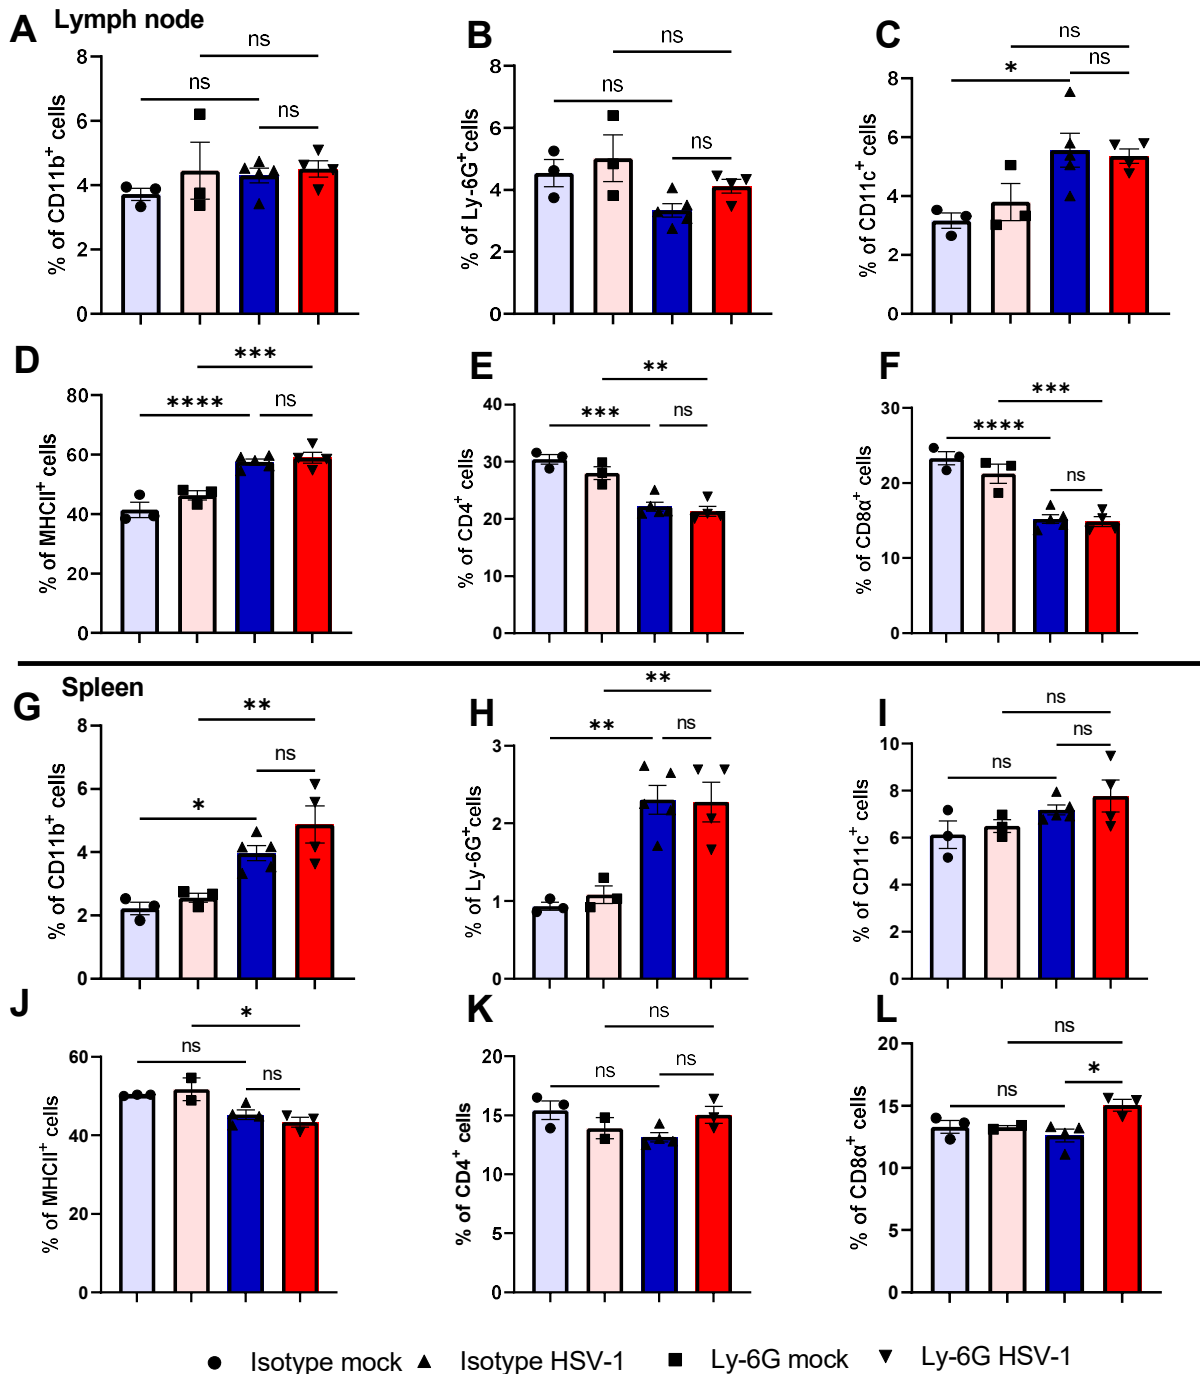

**Supplementary figure 2.** Neutrophil mediated protection during ocular HSV-1 infection. (A-F) Percent abundance of marker immune cell population is presented for the lymph node tissue. For spleen tissue (G-L) a similar set of marker cell populations was determined by flow cytometry. One-way ordinary ANOVA or Student's t-test was performed for statistical analysis ( $\alpha = 0.05$ ). \* $p < 0.05$ ; \*\* $p < 0.01$ ; \*\*\* $p < 0.001$ , \*\*\*\* $p < 0.0001$ , ns, not significant.
